# Supplementary material for: Activity of Binary Combinations of Natural Phenolics and Synthetic Food Preservatives against Food Spoilage Yeasts
Source: Foods. 2023 Mar 22;12(6):1338. doi: 10.3390/foods12061338 (PMC10048113; doi:10.3390/foods12061338)
Supplement: Supplementary file 1 [file foods-12-01338-s001.zip › foods-2248735-supplementary.pdf]

# **Supplementary material**

## **Activity of binary combinations of natural phenolics and synthetic food preservatives against food spoilage yeasts**

Bernard Gitura Kimani <sup>1</sup>, Miklós Takó <sup>1,\*</sup>, Csilla Veres <sup>1</sup>, Judit Krisch <sup>2</sup>, Tamás Papp <sup>1,3</sup>, Erika Beáta Kerekes <sup>1,†</sup> and Csaba Vágvolgyi <sup>1,†</sup>

<sup>1</sup> Department of Microbiology, Faculty of Science and Informatics, University of Szeged, Közép fasor 52, H-6726 Szeged, Hungary

<sup>2</sup> Department of Food Engineering, Faculty of Engineering, University of Szeged, Mars tér 7, H-6724 Szeged, Hungary

<sup>3</sup> ELKH-SZTE Fungal Pathogenicity Mechanisms Research Group, University of Szeged, H-6726 Szeged, Közép fasor 52, Hungary

\*Correspondence: tako78@bio.u-szeged.hu; Tel.: +36-62-544-516

†These authors contributed equally to this work.

## List of figures

**Figure S1.** Checkerboard layout of vanillin-cinnamic acid combinations used against the planktonic growth of *D. hansenii* (**A**), *S. cerevisiae* (**B**), *S. pombe* (**C**) and *W. anomalus* (**D**) spoilage yeasts.

**Figure S2.** Checkerboard layout of phenolic compound-synthetic preservative combinations used against the planktonic growth of *S. pombe* (**A** and **C**), *W. anomalus* (**B**) and *S. cerevisiae* (**D**).

**Figure S3.** Checkerboard layout of phenolic compound-synthetic preservative combinations used against the biofilm growth of *W. anomalus* (**A**), *S. pombe* (**B** and **D**) and *S. cerevisiae* (**C**).

**Figure S4.** Checkerboard layout of vanillin-cinnamic acid combinations used against the biofilm growth of *D. hansenii* (**A**), *W. anomalus* (**B**), *S. cerevisiae* (**C**) and *S. pombe* (**D**).

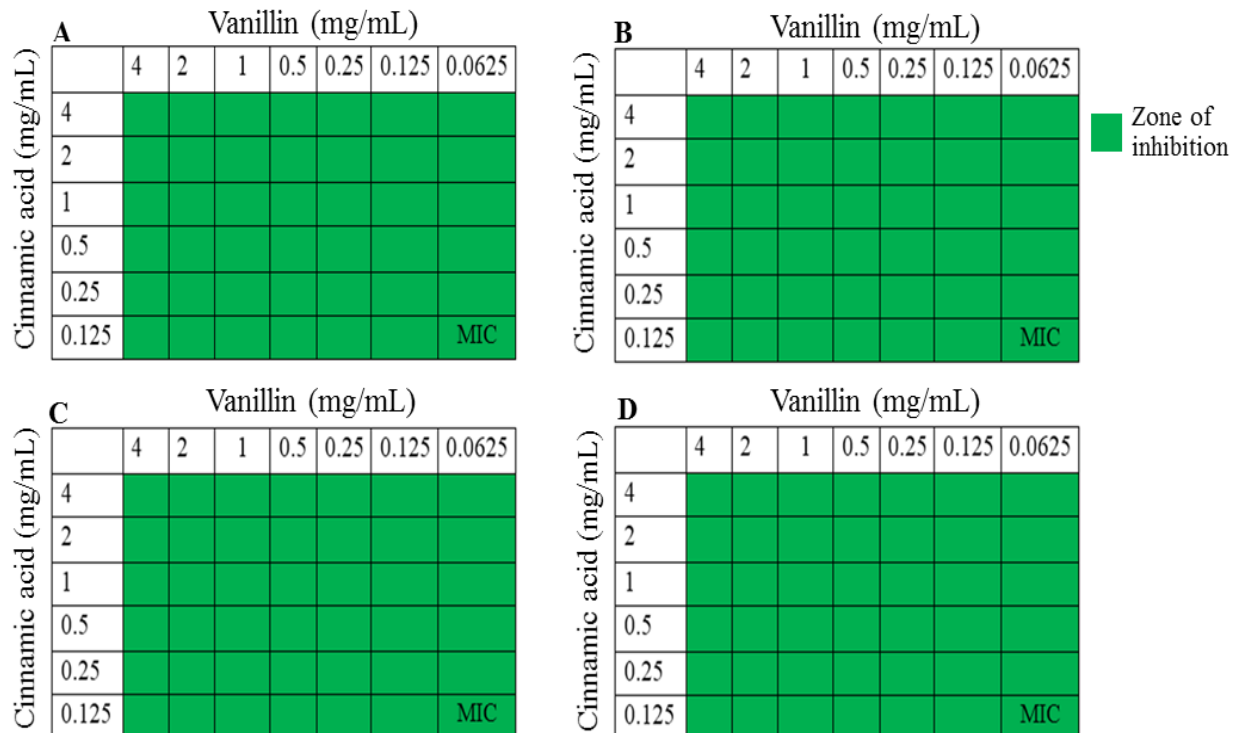

**Figure S1.** Checkerboard layout of vanillin-cinnamic acid combinations used against the planktonic growth of *D. hansenii* (A), *S. cerevisiae* (B), *S. pombe* (C) and *W. anomalus* (D) spoilage yeasts. The MIC is the minimum inhibitory concentration considered in determining the fractional inhibitory concentration index. Lower combinations below the MIC did not inhibit growth.

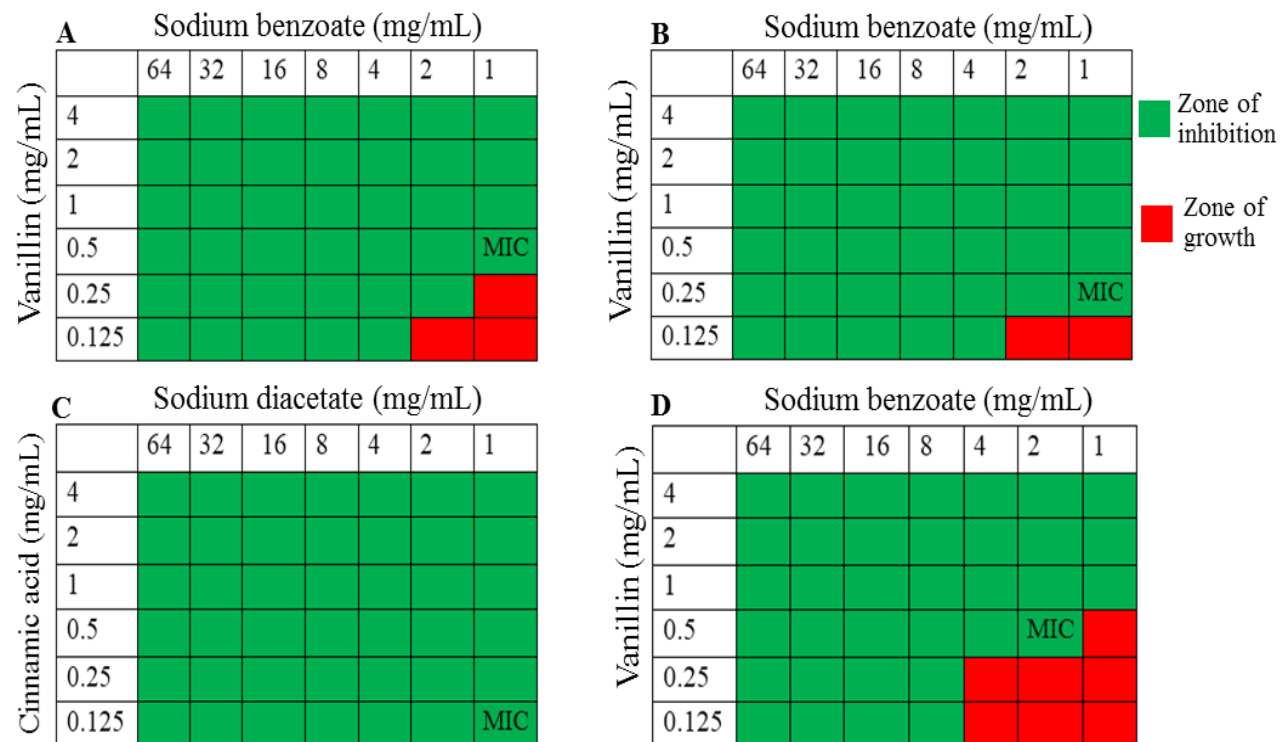

**Figure S2.** Checkerboard layout of phenolic compound-synthetic preservative combinations used against the planktonic growth of *S. pombe* (**A** and **C**), *W. anomalus* (**B**) and *S. cerevisiae* (**D**). The MIC is the minimum inhibitory concentration considered in determining the fractional inhibitory concentration index.

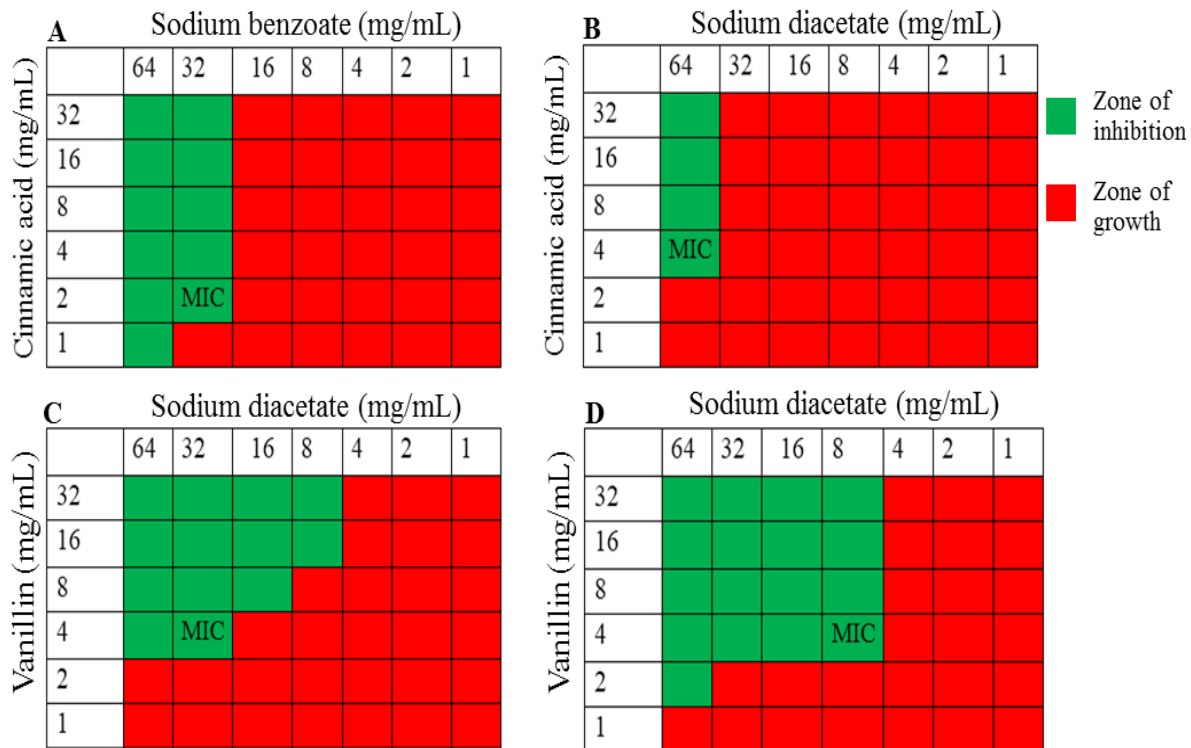

**Figure S3.** Checkerboard layout of phenolic compound-synthetic preservative combinations used against the biofilm growth of *W. anomalus* (**A**), *S. pombe* (**B** and **D**) and *S. cerevisiae* (**C**). The MIC is the minimum inhibitory concentration considered in determining the fractional inhibitory concentration index.

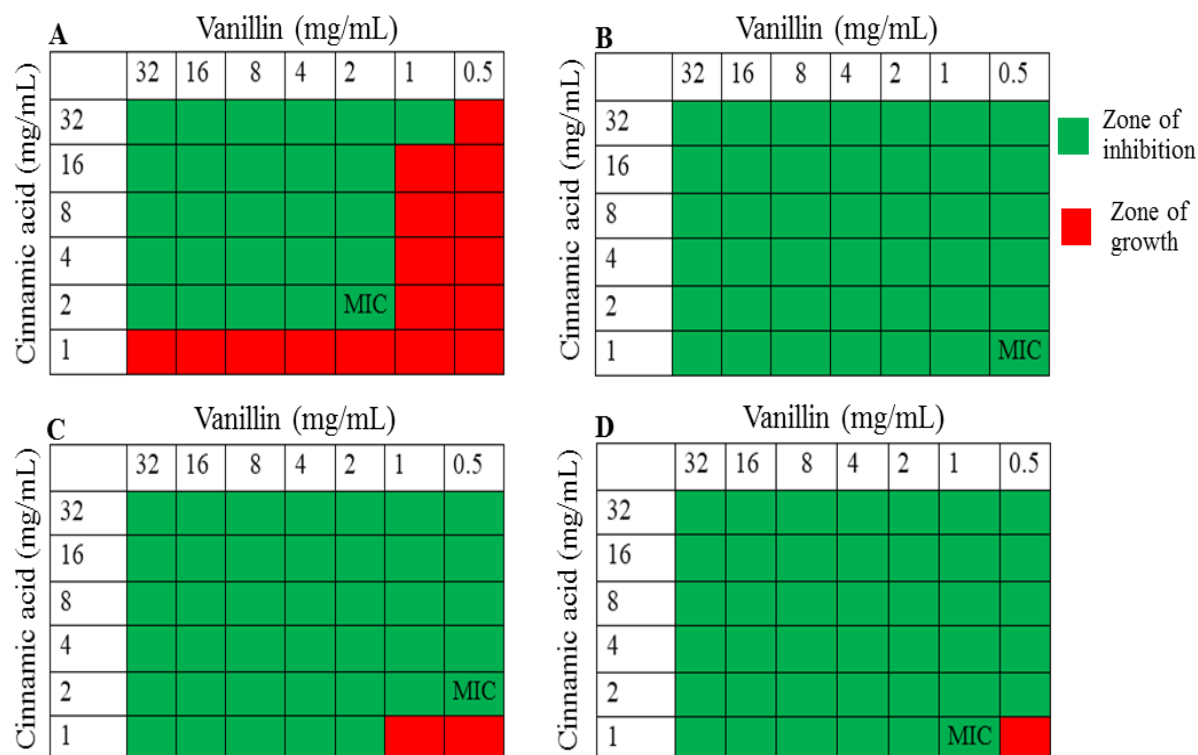

**Figure S4.** Checkerboard layout of vanillin-cinnamic acid combinations used against the biofilm growth of *D. hansenii* (A), *W. anomalus* (B), *S. cerevisiae* (C) and *S. pombe* (D). The MIC is the minimum inhibitory concentration considered in determining the fractional inhibitory concentration index.
